24  
25  
26  
27  
28  
29  
30  
31  
32  
33  
34  
35  
36  
37  
38  
39  
40  
41  
42  
43  
44  
45  
46  
47  
48

## Abstract

**Background.** Medical students' rate of depression, suicidal ideation, anxiety, and burnout have been shown to be higher than those of the same-age general population. However, longitudinal studies spanning the whole course of medical school are scarce and present contradictory findings. This study aims to analyze the longitudinal evolution of mental health and burnout from the first to the last year of medical school using a wide range of indicators. Moreover, biopsychosocial covariates that can influence this evolution are explored.

**Method.** In an open cohort study design, 3066 annual questionnaires were filled in by 1595 different students from the first to the sixth year of the Lausanne Medical School (Switzerland). Depression symptoms, suicidal ideation, anxiety symptoms, stress, and burnout were measured along with biopsychosocial covariates. The longitudinal evolution of mental health and burnout and the impact of covariates were modelled with linear mixed models.

**Results.** Comparison to a same-aged general population sample shows that medical students reported significantly more depression symptoms and anxiety symptoms. Medical students' mental health improved during the course of the studies in terms of depression symptoms, suicidal ideation, and stress, although suicidal ideation increased again in the last year and anxiety symptoms remained stable. Conversely, the results regarding burnout globally showed a significant worsening from beginning to end of medical school. The covariates most strongly related to better mental health and less burnout were less emotion-focused coping, more social support, and more satisfaction with health.

**Conclusion.** Both improvement of mental health and worsening of burnout were observed during the course of medical school. This underlines that the beginning and the end of medical school bring specific challenges with the first years' stressors negatively impacting mental health and the last year's difficulties negatively impacting burnout.

**Keywords:** Mental health; Burnout; Medical students; Longitudinal study

## 49 **Introduction**

50 Medical students have been shown to present more depression [1], anxiety [2], and burnout  
51 [3] than same-aged general population individuals. Meta-analyses have indeed reported a  
52 pooled prevalence of 28.0% of the medical students for depression [1,4], 11.1% for suicidal  
53 ideation [1], 33.8% for anxiety [2], and 44.2% for burnout [5]. Moreover, a study has shown  
54 that before actually starting medical school, medical students present less depression and less  
55 burnout than same-aged general population; suggesting that the course of the medical school  
56 itself may trigger mental health issues and burnout [6].

57 Despite the wealth of literature on the subject, longitudinal studies analyzing the evolution  
58 of mental health and burnout from beginning to end of medical school are still scarce and  
59 present inconsistent findings. For depression symptoms, a meta-analysis estimated a median  
60 increase of 13.5% each curriculum year [1], but another meta-analysis reported a gradual  
61 decrease until the last year of medical school [4]. For anxiety, both increase and decrease  
62 trends have been reported [7] and for suicidal ideation and burnout, longitudinal studies are  
63 too scarce to provide a reliable understanding of their evolution during medical school [1,8].  
64 Consequently, the patterns of evolution of mental health and burnout during medical school  
65 are still unknown.

66 Medical students' mental health issues and burnout have been attributed to different  
67 factors. Entering medical school represent a significant source of stress as it often marks a  
68 transition of moving away from home towards a new social environment with new ways of  
69 studying that demands an important adjustment from students [4]. Then, academic factors of  
70 stress are numerous such as the volume of information to learn, time constraints,  
71 examinations, competition, ethical challenges, and exposure to human suffering [9]. On the  
72 other hand, protective factors have been identified as well: a systematic review reports that the  
73 factors most often related to less mental health issues and burnout in medical students are low

74 neuroticism, less emotion-focused coping strategies, more physical activity, lower study-  
75 related stress, and higher satisfaction with studies [10].

76 The present study aims to add to the existing literature by analyzing the temporal evolution  
77 of mental health and burnout throughout the course of medical school [1,8]. The few studies  
78 using prospective data focused mostly on the first year of medical school or on the two first  
79 years [1,8]. Yet, it seems essential to understand the temporal evolution of medical students'  
80 mental health and burnout throughout the entire medical school curriculum in order to identify  
81 the curriculum years that are most challenging. Moreover, there is a need for more studies  
82 analyzing conjointly a wide range of biopsychosocial covariates of medical students' mental  
83 health and burnout in order to identify the most influential protective and aggravating factors.  
84 The objectives of the present study are thus to (1) compare the mental health and coping  
85 strategies of medical students to same-age general population, (2) describe the evolution of  
86 mental health and burnout from beginning to end of medical school using a wide range of  
87 indicators (depression symptoms, suicidal ideation, anxiety symptoms, stress, emotional  
88 exhaustion, cynicism, and academic efficacy), and (3) identify biopsychosocial covariates  
89 influencing the evolutions of medical students' mental health and burnout.

## 90 **Method**

### 91 **Design and data collection**

92 This is a longitudinal analysis of data from the ETMED-L project [11] collected with an  
93 open cohort study design. An online questionnaire investigating mental health and  
94 interpersonal competence was sent to all medical students (curriculum years 1 to 6)  
95 matriculated at the University of Lausanne (Switzerland), except for the students who are at  
96 the university as part of an academic exchange. It took approximately one hour to fully  
97 complete the online questionnaire and the students received 50CHF (~50USD) for each  
98 completed questionnaire. The present study used the data of the three first waves of the

99 ETMED-L project collected during the months of March 2021, November 2021, and  
100 November 2022.

101 To compare the mental health of medical students to same-aged general population  
102 individuals, data collected as part of the CoLaus|PsyCoLaus were retrieved. Initiated in 2003,  
103 CoLaus|PsyCoLaus is a population-based cohort study that follows a representative sample of  
104 the residents of Lausanne (Switzerland). The study has been designed to investigate  
105 psychiatric disorders and cardiovascular risk factors as well as their association using  
106 structured interviews and questionnaires [12]. For the present study, the data of the offspring  
107 of the participants of CoLaus|PsyCoLaus collected from the 26<sup>th</sup> of March 2008 to the 16<sup>th</sup> of  
108 November 2022 were used.

109 The Research Ethics Committee of the Canton de Vaud approved both the ETMED-L  
110 (project number 2020-02474) and CoLaus|PsyCoLaus (project number PB\_2018–00038,  
111 reference 239/09) projects. All participants gave written informed consent.

## 112 **Measures**

### 113 **Mental health and burnout**

114 The instruments used in the ETMED-L project are detailed in its published protocol [11].  
115 For the present paper, four measures of *mental health* were used. *Depression symptoms* were  
116 assessed with the Center for Epidemiological Studies-Depression [CES-D; 13] with the  
117 validated cut-offs scores of 16 for males, 20 for females, and 19 overall [14]. *Suicidal*  
118 *ideation* was measured with two questions of the Beck Depression Inventory [BDI; 15].  
119 *Anxiety symptoms* were assessed with the State-Trait Anxiety Inventory [STAI; 16] and stress  
120 was measured with a single generic item (“Globally, how would you evaluate your current  
121 stress level on a scale from 1 ‘none’ to 10 ‘extreme’?”). For *burnout*, the Maslach Burnout  
122 Inventory Student-Survey [MBI-SS; 17] was used to measure its three dimensions: *Emotional*  
123 *Exhaustion*, *Cynicism*, and *Academic Efficacy* (reversed dimension). Except for the single

124 item measuring stress, all instruments are well established and have a French validated  
125 version that has been used in the present study.

## 126 **Biopsychosocial covariates**

127 Four *sociological covariates* were analyzed: identifying as male (gender identity  
128 recoded into 1=male and 2=female or non-binary), paid job (hours per week), parents'  
129 education (number of parents with college or university degree), having a partner (1=yes,  
130 0=no), and social support. Social support was measured as the average score of two questions:  
131 "If necessary, in your opinion, to what extent can someone provide you with practical help,  
132 this means concrete help or useful advice, if 0 means "not at all" and 10 "a great deal"?" for  
133 practical support and "To what extent can someone be available in case of need and show  
134 understanding, by talking with you for example, if 0 means "not at all" and 10 "a great deal"?"  
135 for emotional support.

136 Regarding *psychological covariates*, having consulted a psychotherapist during the  
137 past year (1=yes, 0=no) and coping strategies were assessed. Coping strategies were measured  
138 with the French version of the coping section of the Euronet questionnaire [18,19].  
139 Confirmatory factor analysis [20] supported three factors including the dimensions of  
140 *emotion-focused, help-seeking, and problem-focused coping strategies*.

141 Finally, three *biological covariates* were included: Body Mass Index (BMI; weight in  
142 kilograms divided by height in meters squared), physical activity (number of hours per  
143 week), and satisfaction with health ("Are you satisfied with your health?" rated on a scale  
144 from 1=very unsatisfied to 5=very satisfied).

## 145 **Statistical analysis**

146 Medical students were compared to same-age general population individuals using linear  
147 regression with sample (medical students vs general population) as independent variable,  
148 being male as a control variable, and depression symptoms, anxiety symptoms, and coping

149 strategies (the only indicators measured similarly in both the ETMED-L and  
150 CoLaus|PsyCoLaus projects) separately as dependent variables. Cohen's  $d$  was computed for  
151 effect size estimation with  $d$ s of 0.2, 0.5, and 0.8 respectively considered as small, medium,  
152 and large effect sizes [21]. For a more clinically relevant appreciation of the results, a test of  
153 proportion was additionally used to compare the two samples in terms of risk of clinical  
154 depression according to the CES-D cutoff. Note that for all these comparison analyses,  
155 medical students' data at first participation were used.

156 To model the longitudinal evolution of mental health and burnout during the course of the  
157 medical school, Linear Mixed Models (LMMs) were fitted to account for the clustering in the  
158 data due to the repeated measures for each medical students, considering the student specific  
159 effects as random intercepts. Due to funding constraints, the students could not be followed  
160 during the entire six-year of medical school. However, LMMs provides a powerful framework  
161 for modeling the longitudinal evolution of mental health and burnout across the entire six-year  
162 duration of medical school, even when the medical students have been assessed at a maximum  
163 of three time points. This approach indeed effectively accounts for limited and unevenly  
164 spaced data points, facilitating robust insights into trajectories over the entire course of  
165 medical school. Note that different temporal variance-covariance structure such as  
166 autoregressive process of order 1 and autoregressive moving average process were compared  
167 versus unstructured parameterization using likelihood ratio test, then only the most plausible  
168 structure was estimated and presented using Restricted Maximum Likelihood (REML).  
169 REML method was used to produce unbiased estimates of variance and covariance  
170 parameters [22,23]. The linear and non-linear evolution of mental health and burnout were  
171 then tested by including the time as linear, quadratic, and cubic. The best model was chosen  
172 and presented using likelihood ratio tests. The biopsychosocial covariates described in the  
173 Measure section were included in all LMMs. Standardized  $\beta$  are presented for effect sizes

174 estimation. Standardized  $\beta$ s between 0.10–0.29 are considered as small, between 0.30–0.49 as  
175 medium, and 0.50 or greater as large effect sizes [21].

176 Missing data at the item level were replaced by mean scores if less than 20% of the items  
177 were missing. If 20% or if more items were missing, the total score was considered missing.  
178 Missing data at the score level were then handled with full information maximum likelihood  
179 in the LMMs. Stata version 17 [24] and R version 4.2.2 [25] were used for the analyses and p  
180 values  $<.05$  were considered significant.

## 181 **Results**

### 182 **Samples**

183 The eligible students who agreed to participate were 906, 1059, and 1101 for each data  
184 collection wave, resulting in a total of 3066 questionnaires (see participation flow chart in  
185 Supplementary information). From those, 74 questionnaires were excluded because students  
186 gave a wrong answer to at least one of the two attention questions placed in the questionnaire  
187 (e.g., “In order to check your attention, please answer ‘Slightly agree’ to this question.”) and 6  
188 questionnaires were excluded due to technical issues. Thus, each data collection wave  
189 included respectively 886, 1034, and 1066 answered questionnaire, which represent 49.41%,  
190 49.33%, and 54.92% of each wave’s eligible students. Then, 168 students who repeated a year  
191 had to be excluded to have only linear curriculum trajectories. The final sample thus included  
192 2601 questionnaires from 1595 different students with 909 students who participated in only  
193 one wave, 366 who participated in two waves, and 320 who participated in three waves of  
194 data collection.

195 The same-age CoLaus|PsyCoLaus offspring comparison group, included 91 participants  
196 who completed at least one of the questionnaires of interest and gave consent for the reuse of



197 their individual data. They were between 18 and 35 years old with a mean age of 22.99 (SD =  
 198 4.31) and 60.92% were women.

## 199 **Descriptive statistics**

200 The medical student sample descriptive is displayed in Table 1. Medical students were  
 201 between 17 and 49 years old with a mean age of 21.78 (SD = 3.14) and most of them self-  
 202 identified as females (67.90%), which corresponds to the gender proportions generally  
 203 observed in the Lausanne Medical School. Observed means and standard deviation of medical  
 204 students' mental health and burnout for each curriculum year are detailed in Table 2.

205 **Table 1. Sample statistics as indicated at first participation (N=1595)**

|                                           | %Missing | N    | %     | M     | SD   | Min   | Max   |
|-------------------------------------------|----------|------|-------|-------|------|-------|-------|
| <b>Age</b>                                | 0.19     |      |       | 21.78 | 3.14 | 17    | 49    |
| <b>Gender identity</b>                    | 0.00     |      |       |       |      |       |       |
| Male                                      |          | 499  | 31.29 |       |      |       |       |
| Female                                    |          | 1083 | 67.90 |       |      |       |       |
| Non-Binary                                |          | 13   | 0.82  |       |      |       |       |
| <b>Paid job (hours/week)</b>              | 0.13     |      |       | 2.67  | 5.98 | 0     | 50    |
| <b>Parents education</b>                  | 0.00     |      |       |       |      |       |       |
| None with higher education                |          | 407  | 25.52 |       |      |       |       |
| One with higher education                 |          | 346  | 21.69 |       |      |       |       |
| Both with higher education                |          | 842  | 52.79 |       |      |       |       |
| <b>Having a partner</b>                   | 0.13     | 833  | 52.23 |       |      |       |       |
| <b>Social support</b>                     | 0.56     |      |       | 7.95  | 1.98 | 0     | 10    |
| <b>Having consulted a psychotherapist</b> | 0.19     | 387  | 24.26 |       |      |       |       |
| <b>Coping</b>                             |          |      |       |       |      |       |       |
| Emotion-focused                           | 0.50     |      |       | 9.82  | 4.05 | 0     | 24    |
| Problem-focused                           | 0.50     |      |       | 7.33  | 1.78 | 1     | 12    |
| Help-seeking                              | 0.56     |      |       | 5.47  | 2.89 | 0     | 12    |
| <b>BMI</b>                                | 0.31     |      |       | 21.78 | 3.03 | 15.64 | 41.67 |
| <b>Physical activity (hours/week)</b>     | 0.19     |      |       | 3.11  | 2.70 | 0     | 21    |
| <b>Satisfaction with health</b>           | 0.19     |      |       | 3.75  | 1.01 | 1     | 5     |

*Note.* Higher education of parents means a college or university degree.

206  
 207

208 **Table 2. Descriptive statistics of students' mental health and burnout**

|                                                                                     | N   | %Missing | Mean  | SD    | Min | Max | Skewness | Kurtosis | Cronbach's $\alpha$ |
|-------------------------------------------------------------------------------------|-----|----------|-------|-------|-----|-----|----------|----------|---------------------|
| <b>Mental Health</b>                                                                |     |          |       |       |     |     |          |          |                     |
| <i>Depression symptoms (Center for Epidemiological Studies-Depression [CES-D])</i>  |     |          |       |       |     |     |          |          |                     |
| Year 1                                                                              | 592 | .84      | 21.95 | 11.62 | 0   | 55  | 0.49     | 2.68     | .92                 |
| Year 2                                                                              | 358 | .56      | 19.91 | 10.71 | 0   | 50  | 0.53     | 2.66     | .91                 |
| Year 3                                                                              | 466 | .21      | 18.38 | 11.22 | 0   | 58  | 0.81     | 3.31     | .93                 |
| Year 4                                                                              | 404 | .49      | 16.53 | 10.11 | 0   | 52  | 0.79     | 3.37     | .91                 |
| Year 5                                                                              | 425 | .23      | 15.93 | 10.71 | 0   | 56  | 0.96     | 3.87     | .93                 |
| Year 6                                                                              | 343 | .58      | 14.96 | 10.73 | 0   | 51  | 0.84     | 3.19     | .93                 |
| <i>Suicidal Ideation (two items of the Beck Depression Inventory [BDI])</i>         |     |          |       |       |     |     |          |          |                     |
| Year 1                                                                              | 592 | .84      | 0.86  | 1.12  | 0   | 6   | 1.35     | 4.46     | .47                 |
| Year 2                                                                              | 358 | .56      | 0.63  | 0.97  | 0   | 5   | 1.66     | 5.39     | .37                 |
| Year 3                                                                              | 466 | .21      | 0.58  | 1.03  | 0   | 6   | 2.10     | 7.61     | .54                 |
| Year 4                                                                              | 404 | .49      | 0.55  | 0.98  | 0   | 5   | 1.93     | 6.25     | .50                 |
| Year 5                                                                              | 425 | .23      | 0.63  | 0.99  | 0   | 5   | 1.59     | 4.94     | .44                 |
| Year 6                                                                              | 343 | .58      | 0.59  | 0.95  | 0   | 4   | 1.64     | 5.11     | .40                 |
| <i>Anxiety symptoms (trait section of the State-Trait Anxiety Inventory [STAI])</i> |     |          |       |       |     |     |          |          |                     |
| Year 1                                                                              | 592 | .84      | 46.90 | 12.15 | 20  | 78  | 0.03     | 2.42     | .93                 |
| Year 2                                                                              | 358 | .56      | 45.00 | 11.61 | 20  | 76  | 0.16     | 2.57     | .93                 |
| Year 3                                                                              | 466 | .21      | 44.18 | 11.46 | 20  | 80  | 0.07     | 2.53     | .93                 |
| Year 4                                                                              | 404 | .49      | 43.38 | 11.71 | 20  | 78  | 0.18     | 2.36     | .93                 |
| Year 5                                                                              | 425 | .23      | 42.48 | 11.77 | 20  | 74  | 0.13     | 2.26     | .93                 |
| Year 6                                                                              | 342 | .87      | 42.12 | 11.85 | 20  | 73  | 0.17     | 2.30     | .94                 |
| <i>Stress (single generic item)</i>                                                 |     |          |       |       |     |     |          |          |                     |
| Year 1                                                                              | 592 | .84      | 5.86  | 2.09  | 1   | 10  | -0.49    | 2.23     | .                   |
| Year 2                                                                              | 358 | .56      | 5.65  | 2.16  | 1   | 10  | -0.28    | 1.96     | .                   |
| Year 3                                                                              | 466 | .21      | 5.38  | 2.02  | 1   | 9   | -0.22    | 2.03     | .                   |
| Year 4                                                                              | 404 | .49      | 5.21  | 2.16  | 1   | 10  | -0.15    | 1.85     | .                   |
| Year 5                                                                              | 425 | .23      | 5.36  | 2.20  | 1   | 10  | -0.21    | 2.00     | .                   |
| Year 6                                                                              | 342 | .87      | 4.62  | 2.31  | 1   | 10  | 0.25     | 1.88     | .                   |
| <b>Burnout (Maslach Burnout Inventory Student-Survey [MBI-SS])</b>                  |     |          |       |       |     |     |          |          |                     |
| <i>Emotional Exhaustion</i>                                                         |     |          |       |       |     |     |          |          |                     |
| Year 1                                                                              | 592 | .84      | 17.19 | 5.00  | 5   | 30  | 0.19     | 2.68     | .85                 |
| Year 2                                                                              | 358 | .56      | 17.84 | 4.88  | 5   | 30  | -0.01    | 2.68     | .86                 |
| Year 3                                                                              | 466 | .21      | 17.19 | 4.83  | 6   | 30  | 0.30     | 2.90     | .86                 |
| Year 4                                                                              | 404 | .49      | 16.35 | 4.80  | 5   | 30  | 0.33     | 3.05     | .86                 |
| Year 5                                                                              | 425 | .23      | 15.60 | 5.13  | 5   | 30  | 0.43     | 2.95     | .88                 |
| Year 6                                                                              | 342 | .87      | 15.32 | 5.16  | 5   | 30  | 0.19     | 2.63     | .88                 |
| <i>Cynicism</i>                                                                     |     |          |       |       |     |     |          |          |                     |
| Year 1                                                                              | 592 | .84      | 9.18  | 4.47  | 4   | 24  | 0.98     | 3.56     | .84                 |
| Year 2                                                                              | 358 | .56      | 8.88  | 3.77  | 4   | 24  | 0.87     | 3.58     | .79                 |
| Year 3                                                                              | 466 | .21      | 8.98  | 4.07  | 4   | 24  | 1.10     | 4.11     | .83                 |
| Year 4                                                                              | 404 | .49      | 9.75  | 4.59  | 4   | 24  | 0.96     | 3.53     | .88                 |
| Year 5                                                                              | 425 | .23      | 10.59 | 4.81  | 4   | 24  | 0.71     | 2.88     | .88                 |
| Year 6                                                                              | 342 | .87      | 11.02 | 4.91  | 4   | 24  | 0.63     | 2.71     | .88                 |
| <i>Academic Efficacy</i>                                                            |     |          |       |       |     |     |          |          |                     |
| Year 1                                                                              | 592 | .84      | 24.04 | 4.56  | 9   | 36  | -0.17    | 2.91     | .75                 |
| Year 2                                                                              | 358 | .56      | 24.56 | 4.18  | 14  | 36  | -0.03    | 2.73     | .71                 |
| Year 3                                                                              | 466 | .21      | 24.46 | 4.32  | 11  | 36  | -0.24    | 2.81     | .76                 |
| Year 4                                                                              | 404 | .49      | 24.07 | 4.56  | 11  | 36  | -0.11    | 2.87     | .77                 |
| Year 5                                                                              | 425 | .23      | 24.01 | 4.89  | 6   | 36  | -0.34    | 3.05     | .80                 |
| Year 6                                                                              | 342 | .87      | 24.23 | 4.77  | 10  | 35  | -0.38    | 3.08     | .79                 |

209 Note. Skewness > 2 and kurtosis > 7 indicate substantial non-normality [26].

## 210 Comparison to same-age general population

211 Results of linear regressions testing the difference between medical students and same-age  
 212 general population individuals with respect to depression symptoms, anxiety symptoms, and  
 213 coping strategies are displayed in Table 3. Results indicated that medical students presented  
 214 significantly more depression symptoms and anxiety symptoms than the same-age general  
 215 population. A test of proportion further showed that the proportion of individuals who were  
 216 likely to be affected with clinical depression according to the CES-D cutoffs were  
 217 significantly higher in the medical student sample (46.88%) than in the same-age general  
 218 population sample (21.69%),  $Z = 4.49$ ,  $p < .001$ . Regarding coping, medical students reported  
 219 using significantly less help-seeking strategies than same-age general population but did not  
 220 differ in terms of emotion-focused nor problem-focused coping strategies. Cohen's  $d$ s show  
 221 that the difference in depression symptoms was of medium effect size and that it was small  
 222 for anxiety symptoms and help-seeking coping strategies.

223 **Table 3. Comparison between medical students and same-age general population of**  
 224 **mental health and coping at first participation**

| Variables                     | N    | M     | SD    | t       | Cohen's d | F        | R <sup>2</sup> |
|-------------------------------|------|-------|-------|---------|-----------|----------|----------------|
| <b>Depression symptoms</b>    |      |       |       | 4.61*** | 0.51      | 54.95*** | 0.07           |
| Medical students              | 1587 | 19.00 | 11.33 |         |           |          |                |
| General population            | 83   | 12.24 | 9.61  |         |           |          |                |
| <b>Anxiety symptoms</b>       |      |       |       | 2.15*   | 0.25      | 46.96*** | 0.07           |
| Medical students              | 1587 | 44.57 | 12.08 |         |           |          |                |
| General population            | 79   | 40.70 | 11.78 |         |           |          |                |
| <b>Emotion-focused coping</b> |      |       |       | 0.53    | 0.06      | 75.89*** | 0.12           |
| Medical students              | 1587 | 9.82  | 4.05  |         |           |          |                |
| General population            | 79   | 9.67  | 3.81  |         |           |          |                |
| <b>Problem-focused coping</b> |      |       |       | 0.30    | 0.04      | 2.88*    | 0.00           |
| Medical students              | 1587 | 7.33  | 1.78  |         |           |          |                |
| General population            | 79   | 7.43  | 1.56  |         |           |          |                |
| <b>Help-seeking coping</b>    |      |       |       | 2.15*   | 0.25      | 30.40*** | 0.04           |
| Medical students              | 1586 | 5.47  | 2.89  |         |           |          |                |
| General population            | 78   | 6.18  | 2.81  |         |           |          |                |

225 \* $p < .05$ , \*\*\* $p < .001$ .

226 *Note.* Linear regression models including being male and age as a control variable were used. Depression  
 227 symptoms was measured with the Center for Epidemiological Studies-Depression (CES-D), anxiety symptoms  
 228 with the trait section of the State-Trait Anxiety Inventory (STAI), and coping strategies with the Euronet  
 229 questionnaire.

230

## 231 **Longitudinal evolution of mental health and burnout**

232 Results of the LMMs modelling the longitudinal evolution of mental health during medical  
233 school are displayed in Table 4. They showed a significant linear decrease of depression  
234 symptoms and stress from the first to the sixth year of medical school. For suicidal ideation,  
235 the quadratic function of curriculum years was significant, indicating that evolution was  
236 convex (U shape), with a decrease in suicidal ideation until the third year of medical school  
237 followed by an increase until the end of the curriculum. No significant change over  
238 curriculum years was found for anxiety symptoms.

239 The results for burnout's longitudinal evolution during medical school are displayed in  
240 Table 5. They show that academic efficacy (reversed dimension of burnout) significantly  
241 decreased linearly from the first to the last year of medical school. For cynicism, we observed  
242 a slow increase in the two first years of medical school followed by a gradually steeper  
243 increase in the last years (i.e., a significant convex course following a sort of J shape). Finally,  
244 a curvilinear evolution was observed (~ shape) for the emotional exhaustion dimension with  
245 an increase in emotional exhaustion until the second year of medical school, followed by a  
246 decrease until the fifth year, and finally another increase until the sixth year.

247 **Table 4. Linear mixed models of the evolution of mental health including biopsychosocial covariates**

|                              | Depression Symptoms |          |               | Suicidal Ideation |          |               | Anxiety symptoms |          |               | Stress       |          |               |
|------------------------------|---------------------|----------|---------------|-------------------|----------|---------------|------------------|----------|---------------|--------------|----------|---------------|
|                              | <i>Std β</i>        | <i>B</i> | <i>CI</i>     | <i>Std β</i>      | <i>B</i> | <i>CI</i>     | <i>Std β</i>     | <i>B</i> | <i>CI</i>     | <i>Std β</i> | <i>B</i> | <i>CI</i>     |
| (Intercept)                  | .01                 | 29.21*** | 25.32 – 33.09 | -.05              | 1.48***  | 1.04 – 1.92   | .01              | 46.92*** | 42.88 – 50.97 | .00          | 6.35***  | 5.46 – 7.25   |
| Curriculum year              | -.11                | -0.69*** | -0.89 – -0.49 | .00               | -0.14**  | -0.23 – -0.04 | .00              | -0.03    | -0.24 – 0.18  | -.10         | -0.12*** | -0.17 – -0.08 |
| Identifying as male          | -.06                | -1.37**  | -2.24 – -0.50 | .05               | 0.12*    | 0.02 – 0.21   | -.08             | -2.12*** | -3.06 – -1.18 | -.06         | -0.29**  | -0.49 – -0.09 |
| Paid job                     | .01                 | 0.02     | -0.03 – 0.07  | .02               | 0.00     | -0.00 – 0.01  | -.01             | -0.03    | -0.08 – 0.02  | -.01         | 0.00     | -0.01 – 0.01  |
| Parents education            | .01                 | 0.11     | -0.33 – 0.54  | .01               | 0.01     | -0.04 – 0.06  | -.02             | -0.23    | -0.69 – 0.24  | -.05         | -0.14**  | -0.23 – -0.04 |
| Having a partner             | .00                 | 0.06     | -0.63 – 0.75  | -.03              | -0.06    | -0.14 – 0.01  | -.02             | -0.39    | -1.09 – 0.32  | .04          | 0.19*    | 0.03 – 0.34   |
| Social support               | -.16                | -0.95**  | -1.14 – -0.76 | -.11              | -0.06*** | -0.08 – -0.04 | -.11             | -0.71*** | -0.90 – -0.51 | -.07         | -0.08*** | -0.12 – -0.03 |
| Psychotherapist consultation | .12                 | 3.26***  | 2.46 – 4.07   | .06               | 0.13**   | 0.04 – 0.22   | .15              | 4.32***  | 3.50 – 5.13   | .07          | 0.37***  | 0.19 – 0.55   |
| Emotion-focused coping       | .40                 | 1.14***  | 1.05 – 1.24   | .32               | 0.08***  | 0.07 – 0.09   | .44              | 1.33***  | 1.23 – 1.43   | .30          | 0.16***  | 0.14 – 0.19   |
| Problem-focused coping       | .01                 | 0.07     | -0.11 – 0.26  | -.01              | -0.01    | -0.03 – 0.02  | -.02             | -0.16    | -0.35 – 0.02  | .01          | 0.01     | -0.03 – 0.06  |
| Help-seeking coping          | -.09                | -0.34**  | -0.48 – -0.21 | -.09              | -0.03*** | -0.05 – -0.02 | -.08             | -0.32*** | -0.45 – -0.18 | .00          | 0.00     | -0.03 – 0.03  |
| BMI                          | -.03                | -0.10    | -0.22 – 0.02  | -.02              | -0.01    | -0.02 – 0.01  | .00              | -0.01    | -0.14 – 0.13  | .00          | 0.00     | -0.03 – 0.03  |
| Physical activity            | -.04                | -0.18**  | -0.31 – -0.05 | .00               | 0.00     | -0.01 – 0.02  | -.03             | -0.13    | -0.27 – 0.00  | -.05         | -0.04**  | -0.07 – -0.01 |
| Satisfaction with health     | -.19                | -2.22*** | -2.56 – -1.88 | -.17              | -0.18*** | -0.22 – -0.14 | -.13             | -1.53*** | -1.87 – -1.19 | -.16         | -0.35*** | -0.43 – -0.27 |
| Curriculum year <sup>2</sup> |                     |          |               | .06               | 0.02**   | 0.01 – 0.03   |                  |          |               |              |          |               |
| $\sigma^2$                   |                     | 44.24    |               |                   | 0.50     |               |                  | 35.25    |               |              | 2.25     |               |
| $\tau_{00}$ students         |                     | 23.75    |               |                   | 0.32     |               |                  | 38.93    |               |              | 1.32     |               |
| ICC                          |                     | .35      |               |                   | .39      |               |                  | .52      |               |              | .37      |               |
| $N_{students}$               |                     | 1584     |               |                   | 1584     |               |                  | 1584     |               |              | 1584     |               |
| $N_{observations}$           |                     | 2583     |               |                   | 2583     |               |                  | 2583     |               |              | 2583     |               |
| Marginal $R^2$               |                     | .44      |               |                   | .22      |               |                  | .43      |               |              | .23      |               |
| Conditional $R^2$            |                     | .64      |               |                   | .52      |               |                  | .73      |               |              | .52      |               |
| AICc                         |                     | 18129.18 |               |                   | 6760.85  |               |                  | 18143.15 |               |              | 10539.82 |               |

248 \* $p < .05$ , \*\* $p < .01$ , \*\*\* $p < .001$ 

249 *Note.* Std = Standardized. Depression symptoms was measured with the Center for Epidemiological Studies-Depression (CES-D), suicidal ideation with two questions of the  
250 Beck Depression Inventory (BDI), anxiety symptoms with the trait section of the State-Trait Anxiety Inventory (STAI), and stress with a single generic item (“Globally, how  
251 would you evaluate your current stress level on a scale from 1 ‘none’ to 10 ‘extreme’?”).

252 **Table 5. Linear mixed models of the evolution of burnout including biopsychosocial covariates**

|                              | Emotional Exhaustion |          |               | Cynicism     |          |               | Academic Efficacy |          |               |
|------------------------------|----------------------|----------|---------------|--------------|----------|---------------|-------------------|----------|---------------|
|                              | <i>Std β</i>         | <i>B</i> | <i>CI</i>     | <i>Std β</i> | <i>B</i> | <i>CI</i>     | <i>Std β</i>      | <i>B</i> | <i>CI</i>     |
| (Intercept)                  | .07                  | 12.69*** | 10.35 – 15.02 | -.04         | 9.63***  | 7.63 – 11.63  | -.01              | 19.69*** | 17.83 – 21.55 |
| Curriculum year              | -.33                 | 4.68***  | 3.31 – 6.05   | .17          | -0.03    | -0.43 – 0.37  | -.10              | -0.25*** | -0.35 – -0.16 |
| Identifying as male          | -.04                 | -0.48*   | -0.95 – -0.01 | .05          | 0.50*    | 0.04 – 0.96   | -.05              | -0.53*   | -0.96 – -0.09 |
| Paid job                     | .00                  | 0.00     | -0.02 – 0.03  | .01          | 0.01     | -0.02 – 0.03  | .00               | 0.00     | -0.02 – 0.02  |
| Parents education            | .03                  | 0.17     | -0.07 – 0.40  | .05          | 0.26*    | 0.03 – 0.48   | -.03              | -0.14    | -0.36 – 0.07  |
| Having a partner             | .04                  | 0.42*    | 0.07 – 0.77   | .00          | 0.01     | -0.33 – 0.34  | .03               | 0.26     | -0.06 – 0.58  |
| Social support               | -.08                 | -0.21*** | -0.31 – -0.12 | -.10         | -0.23*** | -0.32 – -0.14 | .14               | 0.34***  | 0.25 – 0.42   |
| Psychotherapist consultation | .06                  | 0.68**   | 0.28 – 1.09   | .07          | 0.69***  | 0.31 – 1.08   | -.08              | -0.90*** | -1.27 – -0.53 |
| Emotion-focused coping       | .33                  | 0.42***  | 0.37 – 0.47   | .24          | 0.28***  | 0.23 – 0.32   | -.25              | -0.30*** | -0.34 – -0.25 |
| Problem-focused coping       | .00                  | 0.01     | -0.08 – 0.10  | -.01         | -0.02    | -0.11 – 0.06  | .14               | 0.36***  | 0.27 – 0.44   |
| Help-seeking coping          | -.03                 | -0.05    | -0.12 – 0.02  | -.01         | -0.01    | -0.08 – 0.05  | .07               | 0.12***  | 0.05 – 0.18   |
| BMI                          | .03                  | 0.05     | -0.01 – 0.12  | -.02         | -0.02    | -0.09 – 0.04  | .01               | 0.02     | -0.04 – 0.08  |
| Physical activity            | -.04                 | -0.07*   | -0.14 – -0.01 | .00          | 0.00     | -0.06 – 0.07  | .01               | 0.02     | -0.04 – 0.09  |
| Satisfaction with health     | -.14                 | -0.72*** | -0.89 – -0.56 | -.09         | -0.41*** | -0.57 – -0.25 | .12               | 0.56***  | 0.40 – 0.71   |
| Curriculum year <sup>2</sup> | -.09                 | -1.56*** | -2.01 – -1.12 | .05          | 0.07*    | 0.02 – 0.13   |                   |          |               |
| Curriculum year <sup>3</sup> | .15                  | 0.14***  | 0.10 – 0.18   |              |          |               |                   |          |               |
| $\sigma^2$                   |                      | 8.35     |               |              | 8.61     |               |                   | 7.92     |               |
| $\tau_{00}$ students         |                      | 10.30    |               |              | 8.82     |               |                   | 7.92     |               |
| ICC                          |                      | .55      |               |              | .51      |               |                   | .50      |               |
| $N_{\text{students}}$        |                      | 1584     |               |              | 1584     |               |                   | 1584     |               |
| $N_{\text{observations}}$    |                      | 2583     |               |              | 2583     |               |                   | 2538     |               |
| Marginal $R^2$               |                      | .24      |               |              | .12      |               |                   | .20      |               |
| Conditional $R^2$            |                      | .66      |               |              | .57      |               |                   | .60      |               |
| AICc                         |                      | 14564.06 |               |              | 14255.51 |               |                   | 14023.67 |               |

253 \* $p < .05$ , \*\* $p < .01$ , \*\*\* $p < .001$ 254 *Note.* Std = Standardized. Burnout was measured with the Maslach Burnout Inventory Student-Survey (MBI-SS)

## 255 **Influence of biopsychosocial covariates**

256 The results for the covariates' influence are displayed in Tables 4 and 5. The  
257 biopsychosocial factors that were significantly related to all outcome variables were gender  
258 identification, social support, having consulted a psychotherapist during the last year,  
259 emotion-focused coping, and satisfaction with health. Social support and satisfaction with  
260 health were consistently related to *less* mental health issues and burnout, whereas having  
261 consulted a psychotherapist during the last year and emotion-focused coping were  
262 consistently related to *more* mental issues and burnout. For gender, identifying as male was  
263 significantly associated with less depression symptoms, anxiety symptoms, stress, and  
264 emotional exhaustion, but it was related to more suicidal ideation, more cynicism, and less  
265 academic efficacy (reversed dimension of burnout).

266 Other covariates were related to fewer mental health or burnout variables. Help-seeking  
267 coping was associated to less mental health issues (on all mental health variables), but  
268 unrelated to burnout. Physical activity was related to less depression symptoms, stress, and  
269 emotional exhaustion. Higher parent education was related to less stress, but more cynicism.  
270 Having a partner was related to less stress and emotional exhaustion. And finally, problem-  
271 focused coping was related to more academic efficacy. Having a paid job and BMI were the  
272 only tested covariates that showed no significant influence.

273 According to effect size indicators, the strongest predictors of students' mental health and  
274 burnout were emotion-focused coping (average absolute  $\beta = .33$ ), followed by satisfaction  
275 with health (average absolute  $\beta = .14$ ) and social support (average absolute  $\beta = .11$ ). The  
276 effect sizes are considered medium for emotion-focused coping and small for all other  
277 significant covariates. Overall, the models tested explained between 52% (for suicidal  
278 ideation) and 73% (for anxiety symptoms) of the outcome variables' total variance (fixed  
279 effect plus random structure; "Conditional R<sup>2</sup>").

## 280 **Discussion**

281 The results of the present study show that medical students' mental health gradually  
282 improves in terms of depression symptoms, suicidal ideation, and stress, although suicidal  
283 ideation increases again during the last year of medical school and anxiety symptoms remain  
284 stable throughout the curriculum. For burnout, it is another picture: it worsens with medical  
285 students experiencing gradually more cynicism and less academic efficacy, whereas we  
286 observe a worsening of emotional exhaustion until the end of the second year, followed by an  
287 improvement, and then another surge during the last year.

288 Our results are in line with past findings regarding the comparison between medical  
289 students and general population in terms of mental health [1,2]. This study indeed indicates  
290 that medical students report significantly more depression symptoms and anxiety symptoms  
291 compared to same-age general population individuals. In fact, according to the CES-D  
292 cutoffs, twice as much medical students are at risk of clinical depression compared to same-  
293 age general population individuals. Moreover, a specificity/sensitivity check of the CES-D  
294 cutoffs using data collected as part of the CoLausPsyCoLaus project showed that one third of  
295 the individuals who scored above the CES-D cutoffs presented a clinical depression  
296 diagnosed with the Diagnostic Interview for Genetic Studies (a clinical interview assessing  
297 major mood and psychotic disorders [27]). Based on these analyses, it can be assumed that  
298 around 15% of our participating medical students and up to 20% of the first-year students  
299 presented a clinical depression.

300 Like other studies in the field [4], our results confirm that students present high mental  
301 health issues in the first two years of medical school. On the bright side, medical students'  
302 mental health mostly improved along the curriculum years. Nevertheless, the present study  
303 indicates that the students presented a surge in suicidal ideation and burnout in the last year of  
304 medical school. Given that few longitudinal studies span over the whole medical curriculum,



305 the difficulties met in the last year of medical school has seldomly been described in the past.  
306 The stressors faced at the end of medical school are manifestly different from the ones  
307 medical students face in the first years of their studies. Indeed, the beginning of medical  
308 school is characterized by difficulties that might be faced by any new university students,  
309 such as change of social environment, adaptation to a new learning style, high study  
310 workload, strong competition, and stressful examinations. The impact of these stressors is  
311 likely to lessen along the curriculum years as students adapt to what has become their new  
312 lifestyle and progress along their curriculum. However, the end of medical school can bring  
313 new types of stressors that might be more specific to medical students. Indeed, through  
314 clerkships, medical students are gradually exposed to their potential future practice. They  
315 experience the relationship with patients, but also with co-workers and their hierarchy and  
316 might face difficult situations where they are confronted with the complexity, feeling of  
317 powerlessness, and lack of control that can characterize medical practice. As they enter  
318 clinical practice, the students face their shortcomings and the need to lean on their elders, yet  
319 asking for help is a coping mechanism they employ to a limited degree compared to the  
320 general population, as our results show. Moreover, the perspective of the transition to the  
321 upcoming internship phase can be an important preoccupation for medical students. The end  
322 of studies, anticipated as the long-awaited start of professional practice also corresponds to  
323 the start of postgraduate training. This period of transition brings forth both choices to make  
324 and challenges to overcome. The results of the present study indicate that these stressors faced  
325 at the end of medical school impact mental health and burnout differently than the ones faced  
326 in the beginning of medical school. In the past decade, there has been a debate on whether  
327 burnout and mental health indicators such as depression and anxiety are the same or different  
328 constructs [28]. This study indicates that mental health indicators and burnout are related but  
329 distinct. Indeed, it shows that mental health is more impacted by the generic stressors of the

330 beginning of medical training, whereas burnout is more impacted by the specific stressors of  
331 the end of medical school, which might be characterized by occupational problematics. On the  
332 other hand, suicidal ideation and the emotional exhaustion dimension of burnout were  
333 influenced by both the stressors of the beginning and the end of medical school, which is in  
334 line with previous findings showing that suicidal ideation correlates with both depression and  
335 burnout [29] and that emotional exhaustion is the burnout dimension most strongly correlated  
336 to depression [30].

337 This study further shows that the most influential protective factors against medical  
338 students' mental health issues and burnout are less emotion-focused coping, more social  
339 support, and more satisfaction with health. These covariates were already known to contribute  
340 to medical students' mental health and burnout [10] and can be the target of specific student  
341 support services. For instance, increasing the use of help-seeking coping strategies has the  
342 potential to bring at the same time more adapted coping strategies and more social support.  
343 Our results show relatively low help-seeking coping strategies among the medical students  
344 compared to same-age general population and past studies report on medical students'  
345 reluctance to seek help for mental health issues or burnout because they felt a pressure to be  
346 seen as a competent, feared stigmatization, and had insufficient knowledge of existing support  
347 services [31]. In our university, numerous extra-curricular activities are proposed by different  
348 associations to bring students together and thus increase their social support resources. Also,  
349 accessible on campus psychiatric consultations are available to medical students.

## 350 **Strengths and limitations**

351 The present study's strength lies in its longitudinal design covering the sixth years of  
352 Medical School as well as a large sample. Additionally, the wide array of mental health and  
353 burnout validated indicators as well as the large coverage of biopsychosocial potential  
354 covariates ensures a more comprehensive picture of the topic. Nevertheless, some limitation

355 needs to be acknowledged. First, a yearly measurement might fail to capture short-term  
356 changes in mental health and burnout. Second, the results for stress are to be interpreted with  
357 caution given that it was measured with a single item that has not been validated. Third, each  
358 student participated to a maximum of three time points and most of them participated only in  
359 one or two time points. Further studies with less incomplete data across time points are  
360 warranted to confirm the accuracy of the full trajectories' estimation, ascertain the precision  
361 of parameter estimates, and avoid false-negative results. Finally, the study was run in one  
362 single Swiss university, which limits the generalizability of the findings. It also made it  
363 impossible to evaluate the impact of university-specific factors such as the pedagogical  
364 approach or the study program. Replication in other universities and countries is needed to  
365 corroborate this study's results and explore university-related covariates of medical students'  
366 mental health and burnout.

## 367 **Conclusion**

368 This paper presents one of the rare longitudinal studies of mental health and burnout  
369 spanning from the first to the last year of medical school. Results indicate that the beginning  
370 and the end of medical school bring specific stressors that impact differently medical  
371 students' mental health and burnout. Specifically, medical students face more mental health  
372 issues in the beginning of their studies that lessen along their curriculum but experience more  
373 burnout issues in the last year of medical school. Mental health issues and burnout not only  
374 negatively impacts students' life, but might also affect the students' future medical practice as  
375 they can hinder their professionalism [9,32]. Many medical schools have implemented  
376 protectionist measures to alleviate the mental burden of medical students. The present study  
377 indicates coping strategies, social support, and satisfaction with health as the most influential  
378 covariates that should be primarily targeted by interventions aiming to lessen medical  
379 students' mental health issues and burnout.

## 380 Acknowledgments

381 The authors want to thank Sylvie Felix and Fabienne Thévenaz for their help in the  
382 ETMED-L project's data collection.

383

## 384 References

- 385 1. Rotenstein LS, Ramos MA, Torre M, Segal JB, Peluso MJ, Guille C, et al. Prevalence of  
386 depression, depressive symptoms, and suicidal ideation among medical students: A  
387 systematic review and meta-analysis. *J. Am. Med. Assoc.* 2016;316:2214–36.
- 388 2. Tian-Ci Quek T, Wai-San Tam W, X. Tran B, Zhang M, Zhang Z, Su-Hui Ho C, et al.  
389 The global prevalence of anxiety among medical students: A meta-analysis. *Int. J.*  
390 *Environ. Res. Public. Health* 2019;16:2735.
- 391 3. Erschens R, Keifenheim KE, Herrmann-Werner A, Loda T, Schwille-Kiuntke J, Bugaj  
392 TJ, et al. Professional burnout among medical students: Systematic literature review and  
393 meta-analysis. *Med. Teach.* 2019;41:172–83.
- 394 4. Puthran R, Zhang MWB, Tam WW, Ho RC. Prevalence of depression amongst medical  
395 students: A meta-analysis. *Med. Educ.* 2016;50:456–68.
- 396 5. Frajerman A, Morvan Y, Krebs MO, Gorwood P, Chaumette B. Burnout in medical  
397 students before residency: A systematic review and meta-analysis. *Eur. Psychiatry*  
398 2019;55:36–42.
- 399 6. Brazeau CMLR, Shanafelt T, Durning SJ, Massie FS, Eacker A, Moutier C, et al.  
400 Distress among matriculating medical students relative to the general population. *Acad.*  
401 *Med.* 2014;89:1520.
- 402 7. Hope V, Henderson M. Medical student depression, anxiety and distress outside North  
403 America: A systematic review. *Med. Educ.* 2014;48:963–79.

- 404 8. Dyrbye L, Shanafelt T. A narrative review on burnout experienced by medical students  
405 and residents. *Med. Educ.* 2016;50:132–49.
- 406 9. Dyrbye LN, Thomas MR, Shanafelt TD. Systematic review of depression, anxiety, and  
407 other indicators of psychological distress among U.S. and Canadian medical students.  
408 *Acad. Med.* 2006;81:354–73.
- 409 10. Kötter T, Fuchs S, Heise M, Riemenschneider H, Sanftenberg L, Vajda C, et al. What  
410 keeps medical students healthy and well? A systematic review of observational studies  
411 on protective factors for health and well-being during medical education. *BMC Med.*  
412 *Educ.* 2019;19:94.
- 413 11. Berney A, Carrard V, Berney S, Schlegel K, Gaume J, Gholam M, et al. Study protocol  
414 for the ETMED-L project: longitudinal study of mental health and interpersonal  
415 competence of medical students in a Swiss university using a comprehensive framework  
416 of empathy. *BMJ Open* 2021;11:e053070.
- 417 12. Preisig M, Waeber G, Vollenweider P, Bovet P, Rothen S, Vandelour C, et al. The  
418 PsyCoLaus study: Methodology and characteristics of the sample of a population-based  
419 survey on psychiatric disorders and their association with genetic and cardiovascular risk  
420 factors. *BMC Psychiatry* 2009;9:9.
- 421 13. Radloff LS. The CES-D Scale: A self-report depression scale for research in the general  
422 population. *Appl. Psychol. Meas.* 1977;1:385–401.
- 423 14. Lewinsohn PM, Seeley JR, Roberts RE, Allen NB. Center for Epidemiologic Studies  
424 Depression Scale (CES-D) as a screening instrument for depression among community-  
425 residing older adults. *Psychol. Aging* 1997;12:277–87.
- 426 15. Beck AT. *Depression inventory*. Philadelphia, PA: Center for cognitive therapy; 1978.
- 427 16. Spielberger CD. *Manual for the State-trait Anxiety Inventory*. Palo Alto, CA: Consulting  
428 Psychologists Press; 1983.

- 429 17. Schaufeli WB, Martínez IM, Pinto AM, Salanova M, Bakker AB. Burnout and  
430 engagement in university students: a cross-national study. *J. Cross-Cult. Psychol.*  
431 2002;464–81.
- 432 18. Grob A, Bodmer NM, Flammer A. Living conditions in Europe: The case of  
433 Switzerland. University of Bern, Institute of Psychology, Bern; 1993.
- 434 19. Bodmer NM, Grob A. Well-being and constraints of adolescents: A comparison of  
435 adolescents from single-parent and two-parent families [Bien-être et contraintes  
436 d’adolescents: Une comparaison entre adolescents de familles monoparentales et de  
437 familles biparentales]. *Int. J. Psychol.* 1996;31:39–48.
- 438 20. Perrin M, Vandeleur CL, Castelao E, Rothen S, Glaus J, Vollenweider P, et al.  
439 Determinants of the development of post-traumatic stress disorder, in the general  
440 population. *Soc. Psychiatry Psychiatr. Epidemiol.* 2014;49:447–57.
- 441 21. Cohen J. *Statistical power analysis for the behavioral sciences*. 2nd ed. Hillsdale, NJ:  
442 Lawrence Earlbaum Associates; 1988.
- 443 22. Pinheiro J, Bates D. *Mixed-Effects Models in S and S-PLUS*. Springer Science &  
444 Business Media; 2006.
- 445 23. Gałeccki A, Burzykowski T. Linear Mixed-Effects Model [Internet]. In: Gałeccki A,  
446 Burzykowski T, editors. *Linear Mixed-Effects Models Using R: A Step-by-Step*  
447 *Approach*. New York, NY: Springer; 2013 [cited 2023 Jun 6]. page 245–73. Available  
448 from: [https://doi.org/10.1007/978-1-4614-3900-4\\_13](https://doi.org/10.1007/978-1-4614-3900-4_13)
- 449 24. StataCorp. *Stata Statistical Software: Release 17*. StataCorp LLC. College Station, TX:  
450 2021.
- 451 25. R Core Team. *R: A language and environment for statistical computing*. R Foundation  
452 for Statistical Computing. Vienna, Austria: 2022.

- 453 26. Kim HY. Statistical notes for clinical researchers: assessing normal distribution (2) using  
454 skewness and kurtosis. *Restor. Dent. Endod.* 2013;38:52–4.
- 455 27. Nurnberger JI Jr, Blehar MC, Kaufmann CA, York-Cooler C, Simpson SG, Harkavy-  
456 Friedman J, et al. Diagnostic Interview for Genetic Studies: Rationale, Unique Features,  
457 and Training. *Arch. Gen. Psychiatry* 1994;51:849–59.
- 458 28. Koutsimani P, Montgomery A, Georganta K. The relationship between burnout,  
459 depression, and anxiety: A systematic review and meta-analysis. *Front. Psychol.*  
460 [Internet] 2019 [cited 2023 Jul 26];10. Available from:  
461 <https://www.frontiersin.org/articles/10.3389/fpsyg.2019.00284>
- 462 29. Ryan E, Hore K, Power J, Jackson T. The relationship between physician burnout and  
463 depression, anxiety, suicidality and substance abuse: A mixed methods systematic  
464 review. *Front. Public Health* [Internet] 2023 [cited 2023 Jul 26];11. Available from:  
465 <https://www.frontiersin.org/articles/10.3389/fpubh.2023.1133484>
- 466 30. Bianchi R, Schonfeld IS, Laurent E. Burnout–depression overlap: A review. *Clin.*  
467 *Psychol. Rev.* 2015;36:28–41.
- 468 31. Chew-Graham CA, Rogers A, Yassin N. ‘I wouldn’t want it on my CV or their records’:  
469 medical students’ experiences of help-seeking for mental health problems. *Med. Educ.*  
470 2003;37:873–80.
- 471 32. Dyrbye LN, Massie FS, Eacker A, Harper W, Power D, Durning SJ, et al. Relationship  
472 between burnout and professional conduct and attitudes among US medical students.  
473 *JAMA* 2010;304:1173–80.

474

## 475 **Supporting information**

476 **S1. Participation flow chart**

477 **S2. Correlations between the variables of interest (N = 1595)**
